# Supplementary material for: Hydroxychloroquine and Azithromycin Treatment of Hospitalized Patients Infected with SARS-CoV-2 in Senegal from March to October 2020
Source: MDPI journal article supplement (doi:10.3390/jcm10132954), 2021-06-30
Supplement: s1 [file s1]

Table S1. Patients' clinical and virological characteristics during hospitalization period.

|                                     | Without HCQ+AZM (N=252) | HCQ + AZM (N=674) | Total (N=926) | p value             |
|-------------------------------------|-------------------------|-------------------|---------------|---------------------|
| Duration of hospitalization         |                         |                   |               | 0.661 <sup>1</sup>  |
| Median                              | 12                      | 11                | 11            |                     |
| Q1, Q3                              | 8, 16                   | 8, 16             | 8, 16         |                     |
| Highest NEWS score                  |                         |                   |               | <0.001 <sup>2</sup> |
| Low                                 | 57 (23.9%)              | 269 (44.0%)       | 326 (38.4%)   |                     |
| Low medium                          | 36 (15.1%)              | 153 (25.0%)       | 189 (22.3%)   |                     |
| Medium                              | 34 (14.3%)              | 62 (10.1%)        | 96 (11.3%)    |                     |
| High                                | 111 (46.6%)             | 127 (20.8%)       | 238 (28.0%)   |                     |
| Oxygen needs                        | 127 (50.4%)             | 142 (21.1%)       | 269 (29.0%)   | <0.001 <sup>2</sup> |
| Intensive care unit admission (ICU) | 89 (35.3%)              | 36 (5.3%)         | 125 (13.5%)   | <0.001 <sup>2</sup> |
| Status at the end of follow-up      |                         |                   |               | <0.001 <sup>2</sup> |
| Discharged alive                    | 174 (69.0%)             | 640 (95.0%)       | 814 (87.9%)   |                     |
| Transferred to another hospital     | 11 (4.4%)               | 10 (1.5%)         | 21 (2.3%)     |                     |
| Deaths                              | 67 (26.6%)              | 24 (3.6%)         | 91 (9.8%)     |                     |
| Penicillin                          | 8 (3.2%)                | 10 (1.5%)         | 18 (1.9%)     | 0.110 <sup>2</sup>  |
| 3rd Cephalosporin                   | 87 (34.5%)              | 68 (10.1%)        | 155 (16.7%)   | <0.001 <sup>2</sup> |
| Fluoroquinolone                     | 38 (15.1%)              | 16 (2.4%)         | 54 (5.8%)     | <0.001 <sup>2</sup> |
| Macrolides                          | 72 (28.6%)              | 674 (100.0%)      | 746 (80.6%)   | <0.001 <sup>2</sup> |
| Others antibiotics                  | 22 (8.7%)               | 18 (2.7%)         | 40 (4.3%)     | <0.001 <sup>2</sup> |
| Corticosteroid                      | 63 (25.0%)              | 24 (3.6%)         | 87 (9.4%)     | <0.001 <sup>2</sup> |
| Vitamins                            | 137 (54.4%)             | 315 (46.7%)       | 452 (48.8%)   | 0.046 <sup>2</sup>  |
| Zinc                                | 1 (0.4%)                | 0 (0.0%)          | 1 (0.1%)      | 0.272 <sup>2</sup>  |
| Anticoagulant                       | 6 (2.4%)                | 9 (1.3%)          | 15 (1.6%)     | 0.255 <sup>2</sup>  |

1. Linear Model ANOVA

2. Fisher's Exact Test for Count Data

Table S2: Clinical status of patients on Day 15 (Univariate analysis).

|                                 |                 | clinical status at D15 |            | OR (univariate)           |
|---------------------------------|-----------------|------------------------|------------|---------------------------|
|                                 |                 | hospitalized or dead   | discharged |                           |
| Virus targeted medication       | Without HCQ+AZM | 135 (53.6)             | 117 (46.4) | -                         |
|                                 | HCQ + AZM       | 226 (33.5)             | 448 (66.5) | 2.29 (1.70-3.07, p<0.001) |
| Age categories                  | (18,39]         | 124 (32.0)             | 263 (68.0) | -                         |
|                                 | (40,59]         | 92 (33.6)              | 182 (66.4) | 0.93 (0.67-1.30, p=0.67)  |
|                                 | (60,93]         | 145 (54.7)             | 120 (45.3) | 0.39 (0.28-0.54, p<0.001) |
| Sex                             | Female          | 148 (35.9)             | 264 (64.1) | -                         |
|                                 | Male            | 213 (41.4)             | 301 (58.6) | 0.79 (0.61-1.03, p=0.087) |
| Number of preexisting disorders | 0               | 197 (32.0)             | 418 (68.0) | -                         |
|                                 | ≥1              | 164 (52.7)             | 147 (47.3) | 0.42 (0.32-0.56, p<0.001) |
| Symptoms at admission           |                 |                        |            |                           |
| No COVID symptoms               | No              | 274 (41.3)             | 389 (58.7) | -                         |
|                                 | Yes             | 82 (32.8)              | 168 (67.2) | 1.44 (1.07-1.97, p=0.019) |

|                                            |            |            |            |                           |
|--------------------------------------------|------------|------------|------------|---------------------------|
| Fever                                      | No         | 184 (35.5) | 335 (64.5) | -                         |
|                                            | Yes        | 158 (41.9) | 219 (58.1) | 0.76 (0.58-1.00, p=0.050) |
| Cough                                      | No         | 197 (34.6) | 372 (65.4) | -                         |
|                                            | Yes        | 139 (43.2) | 183 (56.8) | 0.70 (0.53-0.92, p=0.012) |
| Runny nose                                 | No         | 295 (37.2) | 497 (62.8) | -                         |
|                                            | Yes        | 40 (41.7)  | 56 (58.3)  | 0.83 (0.54-1.28, p=0.399) |
| Taste or smell lost                        | No         | 291 (38.8) | 459 (61.2) | -                         |
|                                            | Yes        | 44 (31.4)  | 96 (68.6)  | 1.38 (0.95-2.05, p=0.099) |
| Myalgia                                    | No         | 247 (36.3) | 434 (63.7) | -                         |
|                                            | Yes        | 90 (42.7)  | 121 (57.3) | 0.77 (0.56-1.05, p=0.095) |
| Asthenia                                   | No         | 306 (37.5) | 510 (62.5) | -                         |
|                                            | Yes        | 27 (40.3)  | 40 (59.7)  | 0.89 (0.54-1.49, p=0.650) |
| Diarrhea                                   | No         | 308 (38.0) | 503 (62.0) | -                         |
|                                            | Yes        | 14 (35.0)  | 26 (65.0)  | 1.14 (0.59-2.27, p=0.705) |
| NEWS score at admission time               | low        | 230 (35.2) | 424 (64.8) | -                         |
|                                            | low/medium | 17 (22.4)  | 59 (77.6)  | 1.88 (1.10-3.40, p=0.028) |
|                                            | medium     | 46 (50.0)  | 46 (50.0)  | 0.54 (0.35-0.84, p=0.006) |
|                                            | high       | 68 (65.4)  | 36 (34.6)  | 0.29 (0.18-0.44, p<0.001) |
| Delay between admission and symptoms onset | Mean (SD)  | 6.2 (5.1)  | 6.6 (3.9)  | 1.02 (0.99-1.06, p=0.228) |
| Delay between treatment and symptoms onset | Mean (SD)  | 7.8 (7.0)  | 7.2 (4.1)  | 0.98 (0.95-1.01, p=0.202) |
